# Supplementary material for: Benefits and harms of screening for and treatment of asymptomatic bacteriuria in pregnancy: a systematic review
Source: BMC Pregnancy Childbirth. 2016 Nov 2;16:336. doi: 10.1186/s12884-016-1128-0 (PMC5093995; doi:10.1186/s12884-016-1128-0)
Supplement: Additional file 1: — Search strategy. The file contains the full description of the search strategy. (PDF 18 kb) [file 12884_2016_1128_MOESM1_ESM.pdf]

## **Additional file 1:**

### **Search strategy**

#### **1. EMBASE**

##### **Search interface: Ovid**

Embase 1974 to 2016 January 29

The following search filters were applied:

RCT: Wong [1] – High sensitivity strategy

Systematic review: Wong [1] – Strategy minimizing difference between sensitivity and specificity

| #  | Searches                          |
|----|-----------------------------------|
| 1  | *urinary tract infection/         |
| 2  | exp Bacteriuria/                  |
| 3  | exp Asymptomatic Bacteriuria/     |
| 4  | exp Streptococcus/                |
| 5  | bacteriuri*.ti,ab.                |
| 6  | (urinary* adj3 infection*).ti,ab. |
| 7  | streptococc*.ti,ab.               |
| 8  | or/1-7                            |
| 9  | exp Pregnancy Complications/      |
| 10 | exp Pregnancy/                    |
| 11 | pregnan*.ti,ab.                   |
| 12 | or/9-11                           |
| 13 | 8 and 12                          |
| 14 | random*.tw.                       |
| 15 | clinical trial*.mp.               |
| 16 | exp health care quality/          |
| 17 | or/14-16                          |
| 18 | 13 and 17                         |
| 19 | meta analysis*.mp.                |
| 20 | search*.tw.                       |
| 21 | review.pt.                        |
| 22 | or/19-21                          |
| 23 | 13 and 22                         |
| 24 | 18 or 23                          |
| 25 | 24 not medline*.cr.               |

## 2. MEDLINE

### Search interface: Ovid

- Ovid MEDLINE(R) In-Process & Other Non-Indexed Citations January 29, 2016
- Ovid MEDLINE(R) 1946 to January Week 3 2016
- Ovid MEDLINE(R) Daily Update January 29, 2016

The following search filters were applied:

RCT: Lefebvre [2] – Cochrane Highly Sensitive Search Strategy for identifying randomized trials in MEDLINE: sensitivity-maximizing version (2008 revision)

Systematic review: Wong [1] – High specificity strategy

| #  | Searches                                                   |
|----|------------------------------------------------------------|
| 1  | Bacteriuria/                                               |
| 2  | *Urinary Tract Infections/                                 |
| 3  | Streptococcal Infections/                                  |
| 4  | bacteriuri*.ti,ab.                                         |
| 5  | (urinary* adj3 infection*).ti,ab.                          |
| 6  | streptococc*.ti,ab.                                        |
| 7  | or/1-6                                                     |
| 8  | exp Pregnancy/                                             |
| 9  | pregnan*.ti,ab.                                            |
| 10 | or/8-9                                                     |
| 11 | 7 and 10                                                   |
| 12 | randomized controlled trial.pt.                            |
| 13 | controlled clinical trial.pt.                              |
| 14 | (randomized or placebo or randomly or trial or groups).ab. |
| 15 | drug therapy.fs.                                           |
| 16 | or/12-15                                                   |
| 17 | (animals not (humans and animals)).sh.                     |
| 18 | 16 not 17                                                  |
| 19 | 11 and 18                                                  |
| 20 | cochrane database of systematic reviews.jn.                |
| 21 | (search or MEDLINE or systematic review).tw.               |
| 22 | meta analysis.pt.                                          |
| 23 | or/20-22                                                   |
| 24 | 11 and 23                                                  |
| 25 | 19 or 24                                                   |

### 3. PubMed

#### Search interface: NLM

- PubMed - as supplied by publisher
- PubMed - in process
- PubMed – OLDMEDLINE
- PubMed – pubmednotmedline

| Search | Query                                                                                    |
|--------|------------------------------------------------------------------------------------------|
| #1     | Search bacteriuri*[tiab]                                                                 |
| #2     | Search (urinary*[tiab] AND infection*[tiab]))                                            |
| #3     | Search streptococc*[tiab]                                                                |
| #4     | Search (#1 OR #2 OR #3)                                                                  |
| #5     | Search pregnan*[tiab]                                                                    |
| #6     | Search (#4 AND #5)                                                                       |
| #7     | Search (#6 not medline[sb])                                                              |
| #8     | Search (clinical trial*[tiab] or random*[tiab] or placebo[tiab] or trial[ti])            |
| #9     | Search (#7 AND #8)                                                                       |
| #10    | Search (search[tiab] or meta analysis[tiab] or MEDLINE[tiab] or systematic review[tiab]) |
| #11    | Search (#7 AND #10)                                                                      |
| #12    | Search (#9 OR #11)                                                                       |

### 4. The Cochrane Library

#### Search interface: Wiley

- Cochrane Database of Systematic Reviews : Issue 1 of 12, January 2016
- Cochrane Central Register of Controlled Trials : Issue 1 of 12, January 2016
- Database of Abstracts of Reviews of Effect : Issue 2 of 4, April 2015
- Health Technology Assessment Database : Issue 1 of 4, January 2016

| ID | Search                                                     |
|----|------------------------------------------------------------|
| #1 | MeSH descriptor: [Bacteriuria] this term only              |
| #2 | MeSH descriptor: [Urinary Tract Infections] this term only |
| #3 | MeSH descriptor: [Streptococcal Infections] this term only |
| #4 | #1 or #2 or #3                                             |
| #5 | bacteriuri*:ti,ab                                          |
| #6 | bacteriuri*                                                |
| #7 | (urinary* near/3 infection*):ti,ab                         |

| ID  | Search                                                             |
|-----|--------------------------------------------------------------------|
| #8  | urinary* near/3 infection*                                         |
| #9  | streptococc*:ti,ab                                                 |
| #10 | streptococc*                                                       |
| #11 | #4 or #5 or #7 or #9                                               |
| #12 | #4 or #6 or #8 or #10                                              |
| #13 | MeSH descriptor: [Pregnancy] explode all trees                     |
| #14 | pregnan*:ti,ab                                                     |
| #15 | pregnan*                                                           |
| #16 | #13 or #14                                                         |
| #17 | #13 or #15                                                         |
| #18 | #11 and #16 in Cochrane Reviews (Reviews and Protocols) and Trials |
| #19 | #12 and #17 in Other Reviews and Technology Assessments            |

## References

1. Wong SSL, Wilczynski NL, Haynes RB. Comparison of top-performing search strategies for detecting clinically sound treatment studies and systematic reviews in MEDLINE and EMBASE. J Med Libr Assoc. 2006;94(4):451-5.
2. Lefebvre C, Manheimer E, Glanville J. Searching for studies. In: Higgins JPT, Green S, editors. Cochrane handbook for systematic reviews of interventions. New York: Wiley; 2008. p. 95-150.
